# Supplementary material for: The 14-3-3 Protein BdGF14a Increases the Transcriptional Regulation Activity of BdbZIP62 to Confer Drought and Salt Resistance in Tobacco
Source: MDPI journal article supplement (doi:10.3390/plants13020245), 2024-01-15
Supplement: s1 [file s1]

**Table S1.** Primers for qRT-PCR and constructions pBI121 vector of *BdGF14a* and *BdbZIP62*.

| Gene Name              | Forward/ Reverse primers(5'-3')                              |
|------------------------|--------------------------------------------------------------|
| <i>BdGF14a-qPCR</i>    | CATTACGCAGCTACCTGT<br>AATGGACTAATAACGCAGCTC                  |
| <i>BdZIP62-qPCR</i>    | GAGAGGCCAAAAGAATGAG<br>AGACATCTTCAGTCACGG                    |
| <i>BdSamDC</i>         | TGCTAATCTGCTCCAATGGC<br>GACGCAGCTGACCACCTAGA                 |
| pBI121- <i>BdGF14a</i> | GCTCTAGAATGTCTACTGCTGAGGCAACC<br>CGGGATCCGTGACCCTCTCCTTCAGGC |
| pBI121- <i>BdZIP62</i> | GCTCTAGAATGGATTTTCCGGGAGGGAG<br>CGGGATCCCGGCCCTGTCAGTGTCC    |

**Table S2.** Primers for ascertaining the expressions of stress-related marker genes.

| Gene Name       | Forward/ Reverse primers(5'-3')                  |
|-----------------|--------------------------------------------------|
| <i>NtGAPDH</i>  | TGCCTTGAGCAAGAACTTTGtG<br>GGCAGATCAAATCAATCACACG |
| <i>NtERD10D</i> | GAGGACACGGCTGTACCAGT<br>GCGCCACTTCCTCTGTCTT      |
| <i>NtERD10C</i> | AACGTGGAGGCTACAGATCG<br>GTTCTCTTGGGCATGAGTT      |
| <i>NtLEA5</i>   | TTGAATCTGGGGTTTTGGTT<br>GGAAGCATTGACGAGCTAGG     |
| <i>NtNCED1</i>  | AAGAATGGCTCCGCAAGTTA<br>GCCTAGCAATTCCAGAGTGG     |
| <i>NtABF2</i>   | GCAGCCATCTATCTATTC<br>GCAACTCATCCATATTCA         |
| <i>TobLTP1</i>  | GGTTTGTGCATGGTGGTGG<br>CTTAGAGCAGTCTGTGGAGG      |
| <i>NtLTP1</i>   | GCAGAAGCCATAACCTGTGG<br>CAGTGAAGGGCTGATCTTG      |
| <i>NtDREB3</i>  | GCCGGAATACACAGGAGAAG<br>CCAATTTGGGAACACTGAGG     |
| <i>NtPOX2</i>   | CTTGGAACACGACGTTTCCTT<br>TCGCTATCGCCATTCTTTCT    |
| <i>NtSOD</i>    | CTCCTACCGTCGCCAAAT<br>GCCCCAACCAAGAGAACCC        |
| <i>NtCAT1</i>   | AGGTACCGCTCATTACACACC                            |

---

|                |                                                     |
|----------------|-----------------------------------------------------|
|                | AAGCAAGCTTTTGACCCAGA                                |
| <i>NtAPX</i>   | CAAATGTAAGAGGAACTCAGAGGA<br>CAGCCTTGAGCCTCATGGTACCG |
| <i>NtGST</i>   | CCCCTAGTTTGCTCCCTTCT<br>TTCTTAGCTGCCTCCTGCTC        |
| <i>NtCAX3</i>  | CGGTTTGGCAATAATTGTCACAG<br>CAACGATCATGCTTCAATCATCC  |
| <i>NtCAX2</i>  | GGTCATCAACTCAGATAT<br>TAGCATAGAATAAGCATCA           |
| <i>NKT1</i>    | CCTAATGAATCTGATAGC<br>CGAGAAGTAGAAGAATAC            |
| <i>NtSOS1</i>  | CAAATGTTATCCCCGAAAGC<br>CGGAGAACCTGAGGAAATGTGA      |
| <i>NtNHX2</i>  | ACTCATCCCCATTGGTCCG<br>AAGGAGTTCCACAAAAGCACGA       |
| <i>NtNHX4</i>  | CAAGAACTTCCGCACCCAC<br>GCAGTATCAAACGCAGAGGACC       |
| <i>NtRbohD</i> | AATAAGGAGTCTAAGGAAT<br>GGAATCAGTTGTAATGTT           |
| <i>NtRbohF</i> | AATAATGGTAATCCTTATGG<br>GTAGACAATGACAAGAAG          |
| <i>NtP5CS1</i> | ATCTTCTAGTTCTGTTGA<br>CTCTCCTTAATGTATGTG            |
| <i>NtADC1</i>  | CTTGCTGATTACCGCAATTTATC<br>TAGGATCAGCAGCCCCCATAGCC  |
| <i>NtSAMDC</i> | CATTACATTACCCCGGAAG<br>AGCAACATCAGCATGCAAAG         |
| <i>NtSUS1</i>  | GTGGGGAAACACCGCTGAA<br>CAACAAGGATGCGAGGGATGA        |
| <i>NtSPSA</i>  | GAATTCAGGCGCTTCGTTGTCA<br>ACCCCTAGTTTCTCCAGTGA      |

---

**Table S3.** Primers for Y1H and Y2H assays.

| Gene Name      | Forward/ Reverse primers(5'-3')                                                    |
|----------------|------------------------------------------------------------------------------------|
| pGBKT7-BdGF14a | GGAATTCATATGATGTCTACTGCTGAGGCAACC<br>CGGGATCCCTTAGTGACCCTCTCCTTCAGGC               |
| pGADT7-NtABF2  | CCATGGAGGCCAGTGAATTCATGGGGAGTAATTTTAATT<br>CAGCTCGAGCTCGATGGATCCTTACCATGGACCAGTCTG |
| pHIS2-ABRE     | AATTCACGTGACGTGACGTGGAGCT<br>CCACGTCACGTACGTG                                      |

**Table S4.** Primers and sequences for LUC assay.

| Gene Name               | Forward/ Reverse primers(5'-3')                                                                    |
|-------------------------|----------------------------------------------------------------------------------------------------|
| pGreenII 62-SK-NtABF2   | TAGAACTAGTGGATCCATGGGGAGTAATTTTAATTTC<br>CGGGCCCCCCTCGAGTTACCATGGACCAGTCTGTCTG                     |
| pGreenII 62-SK-BdbZIP62 | TAGAACTAGTGGATCCATGGATTTTCCGGGAGGGAG<br>CGGGCCCCCCTCGAGTCACGGCCCTGTCAGTGTCC                        |
| pGreenII 62-SK-BdGF14a  | TAGAACTAGTGGATCCATGTCTACTGCTGAGGCAA<br>CGGGCCCCCCTCGAGGTGACCCTCTCCTTCAGGC                          |
| pGreenII                | CGGGCCCCCCTCGAGGGATGGGACAGAAA                                                                      |
| 0800-LUC-NtNECD1-p      | TAGAACTAGTGGATCCCAAGGGTCACCTC                                                                      |
| pGreenII                | CGGGCCCCCCTCGAGGGATGGGACAGAATTT                                                                    |
| 0800-LUC-NtNECD1-mp     | TAGAACTAGTGGATCC CAAGGGTCACCTC                                                                     |
| NtNECD1-p               | GGATGGGACAGAAACGTGTGGGACATAATGATGTGACATAGATTTAGG<br>TTAAGTGGAGAAATAAAACCGACACGTGGGTAGGAGGTGACCCTTG |
| NtNECD1-mp              | GGATGGGACAGAAAttTGTGGGACATAATGATGTGACATAGATTTAGGTT<br>AAGTGGAGAAATAAAACCGACtTtTGGGTAGGAGGTGACCCTTG |

**A**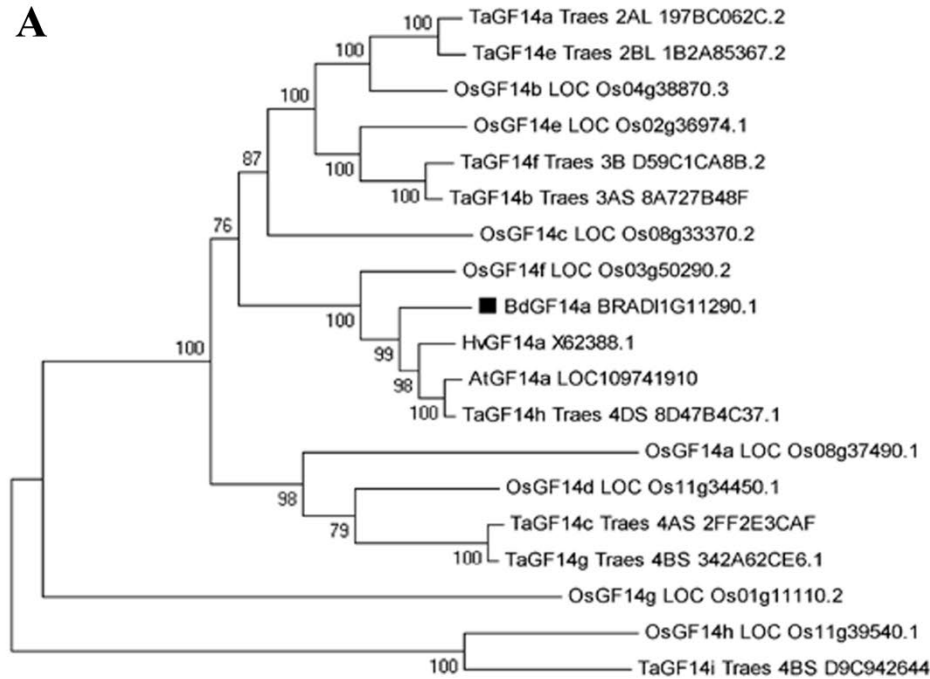**B**

0.05

α1 α2 α3

TaGF14e : -MTAPAEISREENVNMAKLAQAERYEMVFMKVAITVDV-----LTVEERNLLSVYKKNVIGARRASRIISIPQKEESRGNEDRV  
 OsGF14h : -----MKREKVVRLAKLAQAERYDDVFMKTLARM-----DMSREERLLSVYKKNVIGARRASRIISIPQKEESRGNEDRV  
 OsGF14a : MAAAAGGTRREENVNMAKLAQAERYEMVFMKVAITAGGG--GGGLTVEERNLLSVYKKNVIGARRASRIISIPQKEESRGNEDRV  
 TaGF14f : -MAQPAELISREENVNMAKLAQAERYEMVFMKVAITVDV-----LTVEERNLLSVYKKNVIGARRASRIISIPQKEESRGNEDRV  
 OsGF14f : -MSPAELISREENVNMAKLAQAERYEMVFMKVAITVDV-----LTVEERNLLSVYKKNVIGARRASRIISIPQKEESRGNEDRV  
 OsGF14g : -----MAPSDDLVMMAKLAQAERYDDVFMKTLARM-----GLTVEERNLLSVYKKNVIGARRASRIISIPQKEESRGNEDRV  
 TaGF14h : --MSTAETATREENVNMAKLAQAERYEMVFMKVAITADV-----LTVEERNLLSVYKKNVIGARRASRIISIPQKEESRGNEDRV  
 HvGF14a : --MSTAETATREENVNMAKLAQAERYEMVFMKVAITADV-----LTVEERNLLSVYKKNVIGARRASRIISIPQKEESRGNEDRV  
 BdGF14a : --MSTAETATREENVNMAKLAQAERYEMVFMKVAITADV-----LTVEERNLLSVYKKNVIGARRASRIISIPQKEESRGNEDRV  
 TaGF14g : --MSPAELISREENVNMAKLAQAERYEMVFMKVAITGGAGPGE--LSVEERNLLSVYKKNVIGARRASRIISIPQKEESRGNEDRV  
 TaGF14c : --MSPAELISREENVNMAKLAQAERYEMVFMKVAITGGAGPGE--LSVEERNLLSVYKKNVIGARRASRIISIPQKEESRGNEDRV  
 TaGF14a : -MTAPAEISREENVNMAKLAQAERYEMVFMKVAITVDV-----LTVEERNLLSVYKKNVIGARRASRIISIPQKEESRGNEDRV  
 TaGF14b : -MAQPAELISREENVNMAKLAQAERYEMVFMKVAITVDV-----LTVEERNLLSVYKKNVIGARRASRIISIPQKEESRGNEDRV  
 AtGF14a : --MSTAETATREENVNMAKLAQAERYEMVFMKVAITADV-----LTVEERNLLSVYKKNVIGARRASRIISIPQKEESRGNEDRV  
 OsGF14c : -----MSREENVNMAKLAQAERYEMVFMKVAITVDV-----LTVEERNLLSVYKKNVIGARRASRIISIPQKEESRGNEDRV  
 OsGF14e : -MSQPAELISREENVNMAKLAQAERYEMVFMKVAITVDV-----LTVEERNLLSVYKKNVIGARRASRIISIPQKEESRGNEDRV  
 OsGF14d : --MSPAELISREENVNMAKLAQAERYEMVFMKVAITGGAGPGE--LSVEERNLLSVYKKNVIGARRASRIISIPQKEESRGNEDRV  
 OsGF14b : -MSQAELISREENVNMAKLAQAERYEMVFMKVAITVDV-----LTVEERNLLSVYKKNVIGARRASRIISIPQKEESRGNEDRV  
 TaGF14i : -----MEEGKVVRLAKLAQAERYDDVFMKTLARM-----DMSREERLLSVYKKNVIGARRASRIISIPQKEESRGNEDRV

α4 α5 α6

TaGF14e : TLRHYRGIETELSKICDGIKLLDHLVPSSTAESKVFYIKMGDYRYLAEFKSGGERDAEENTMWAYAAADTAAEAPTHPTIR  
 OsGF14h : --LNGYRKVEDELRVQNEVLSITAIICLFLANGSNVVFYIKMGDYRYLAEFKSGGERDAEENTMWAYAAADTAAEAPTHPTIR  
 OsGF14a : AAARSYRVRVEDELSNICAFILRLDERVFAAAVDARVFIKMGDYRYLAEFKSGGERDAEENTMWAYAAADTAAEAPTHPTIR  
 TaGF14f : TLRHYRGIETELSKICDGIKLLDHLVPSSTAESKVFYIKMGDYRYLAEFKSGGERDAEENTMWAYAAADTAAEAPTHPTIR  
 OsGF14f : ASIRHYRGIETELSKICDGIKLLDHLVPSSTAESKVFYIKMGDYRYLAEFKSGGERDAEENTMWAYAAADTAAEAPTHPTIR  
 OsGF14g : RQTAHYRVRVEDEMDICDVIINIDKYIIPHSAGAESVFIKMGDYRYLAEFKSGGERDAEENTMWAYAAADTAAEAPTHPTIR  
 TaGF14h : ASIRHYRGIETELSKICDGIKLLDHLVPSSTAESKVFYIKMGDYRYLAEFKSGGERDAEENTMWAYAAADTAAEAPTHPTIR  
 BdGF14a : ASIRHYRGIETELSKICDGIKLLDHLVPSSTAESKVFYIKMGDYRYLAEFKSGGERDAEENTMWAYAAADTAAEAPTHPTIR  
 TaGF14c : ATIRSYRGIETELSKICDGIKLLDHLVPSSTAESKVFYIKMGDYRYLAEFKSGGERDAEENTMWAYAAADTAAEAPTHPTIR  
 TaGF14g : ATIRSYRGIETELSKICDGIKLLDHLVPSSTAESKVFYIKMGDYRYLAEFKSGGERDAEENTMWAYAAADTAAEAPTHPTIR  
 TaGF14a : TLRHYRGIETELSKICDGIKLLDHLVPSSTAESKVFYIKMGDYRYLAEFKSGGERDAEENTMWAYAAADTAAEAPTHPTIR  
 TaGF14b : TLRHYRGIETELSKICDGIKLLDHLVPSSTAESKVFYIKMGDYRYLAEFKSGGERDAEENTMWAYAAADTAAEAPTHPTIR  
 AtGF14a : ASIRHYRGIETELSKICDGIKLLDHLVPSSTAESKVFYIKMGDYRYLAEFKSGGERDAEENTMWAYAAADTAAEAPTHPTIR  
 OsGF14c : TLRHYRGIETELSKICDGIKLLDHLVPSSTAESKVFYIKMGDYRYLAEFKSGGERDAEENTMWAYAAADTAAEAPTHPTIR  
 OsGF14e : TLRHYRGIETELSKICDGIKLLDHLVPSSTAESKVFYIKMGDYRYLAEFKSGGERDAEENTMWAYAAADTAAEAPTHPTIR  
 OsGF14d : ATIRSYRGIETELSKICDGIKLLDHLVPSSTAESKVFYIKMGDYRYLAEFKSGGERDAEENTMWAYAAADTAAEAPTHPTIR  
 OsGF14b : TLRHYRGIETELSKICDGIKLLDHLVPSSTAESKVFYIKMGDYRYLAEFKSGGERDAEENTMWAYAAADTAAEAPTHPTIR  
 TaGF14i : --LSYRHYRVEDELRVQNEVLSITAIICLFLANGSNVVFYIKMGDYRYLAEFKSGGERDAEENTMWAYAAADTAAEAPTHPTIR

α7 α8 α9

TaGF14e : LGLALNSVFYFYLINSPPDRACNLAKQAFDEAISELDTLSEESYKDSSTLMOLLRONLTWTSLTEDETAEP--KHSSEGO  
 OsGF14h : LGLALNSVFYFYLINSPPDRACNLAKQAFDEAISELDTLSEESYKDSSTLMOLLRONLTWTSLTEDETAEP--KHSSEGO  
 OsGF14a : LGLALNSVFYFYLINSPPDRACNLAKQAFDEAISELDTLSEESYKDSSTLMOLLRONLTWTSLTEDETAEP--KHSSEGO  
 TaGF14f : LGLALNSVFYFYLINSPPDRACNLAKQAFDEAISELDTLSEESYKDSSTLMOLLRONLTWTSLTEDETAEP--KHSSEGO  
 OsGF14f : LGLALNSVFYFYLINSPPDRACNLAKQAFDEAISELDTLSEESYKDSSTLMOLLRONLTWTSLTEDETAEP--KHSSEGO  
 OsGF14g : LGLALNSVFYFYLINSPPDRACNLAKQAFDEAISELDTLSEESYKDSSTLMOLLRONLTWTSLTEDETAEP--KHSSEGO  
 TaGF14h : LGLALNSVFYFYLINSPPDRACNLAKQAFDEAISELDTLSEESYKDSSTLMOLLRONLTWTSLTEDETAEP--KHSSEGO  
 HvGF14a : LGLALNSVFYFYLINSPPDRACNLAKQAFDEAISELDTLSEESYKDSSTLMOLLRONLTWTSLTEDETAEP--KHSSEGO  
 BdGF14a : LGLALNSVFYFYLINSPPDRACNLAKQAFDEAISELDTLSEESYKDSSTLMOLLRONLTWTSLTEDETAEP--KHSSEGO  
 TaGF14c : LGLALNSVFYFYLINSPPDRACNLAKQAFDEAISELDTLSEESYKDSSTLMOLLRONLTWTSLTEDETAEP--KHSSEGO  
 TaGF14g : LGLALNSVFYFYLINSPPDRACNLAKQAFDEAISELDTLSEESYKDSSTLMOLLRONLTWTSLTEDETAEP--KHSSEGO  
 TaGF14a : LGLALNSVFYFYLINSPPDRACNLAKQAFDEAISELDTLSEESYKDSSTLMOLLRONLTWTSLTEDETAEP--KHSSEGO  
 TaGF14b : LGLALNSVFYFYLINSPPDRACNLAKQAFDEAISELDTLSEESYKDSSTLMOLLRONLTWTSLTEDETAEP--KHSSEGO  
 AtGF14a : LGLALNSVFYFYLINSPPDRACNLAKQAFDEAISELDTLSEESYKDSSTLMOLLRONLTWTSLTEDETAEP--KHSSEGO  
 OsGF14c : LGLALNSVFYFYLINSPPDRACNLAKQAFDEAISELDTLSEESYKDSSTLMOLLRONLTWTSLTEDETAEP--KHSSEGO  
 OsGF14e : LGLALNSVFYFYLINSPPDRACNLAKQAFDEAISELDTLSEESYKDSSTLMOLLRONLTWTSLTEDETAEP--KHSSEGO  
 OsGF14d : LGLALNSVFYFYLINSPPDRACNLAKQAFDEAISELDTLSEESYKDSSTLMOLLRONLTWTSLTEDETAEP--KHSSEGO  
 OsGF14b : LGLALNSVFYFYLINSPPDRACNLAKQAFDEAISELDTLSEESYKDSSTLMOLLRONLTWTSLTEDETAEP--KHSSEGO  
 TaGF14i : LGLALNSVFYFYLINSPPDRACNLAKQAFDEAISELDTLSEESYKDSSTLMOLLRONLTWTSLTEDETAEP--KHSSEGO

**Figure S1.** Phylogenetic relationship and multiple alignment of BdGF14a with other GF14 members. (A) Phylogenetic relationship of BdGF14a with TaGF14a (2AL), TaGF14e (2BL), OsGF14b, OsGF14e, TaGF14f, TaGF14b, OsGF14c, OsGF14f, HvGF14a, AtGF14a, TaGF14h, OsGF14a, OsGF14d, TaGF14c, TaGF14g, OsGF14g, OsGF14h and TaGF14i was constructed by MEGA6. (B) Multiple of BdGF14a protein. Multiple alignment of amino acid sequences BdGF14a and other related GF14 proteins from selected plant species. Alignments were performed by using Clustal W software.

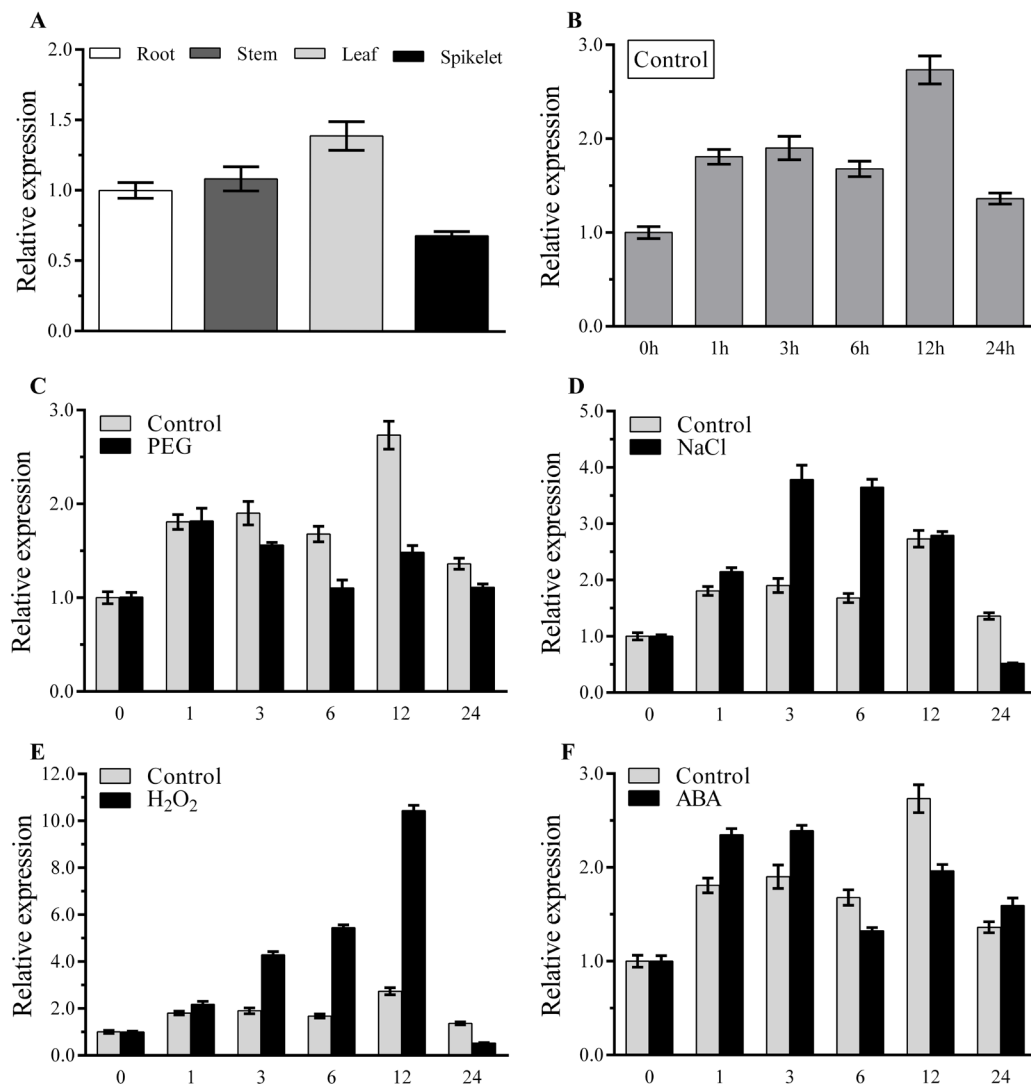

**Figure S2.** Expression patterns of BdGF14a in different organs and stress treatments in *B. distachyon* analysed by qRT-PCR analysis. (A) Different *B. distachyon* tissues including leaf, stem, root, and spikelet were sampled. The seedlings of *B. distachyon* were obtained under control (B), PEG (C), NaCl (D), H<sub>2</sub>O<sub>2</sub> (E) and ABA (F) conditions. The relative expression of BdGF14a was analyzed by the  $2^{-\Delta\Delta CT}$  method. Error bars are calculated from three replicates.

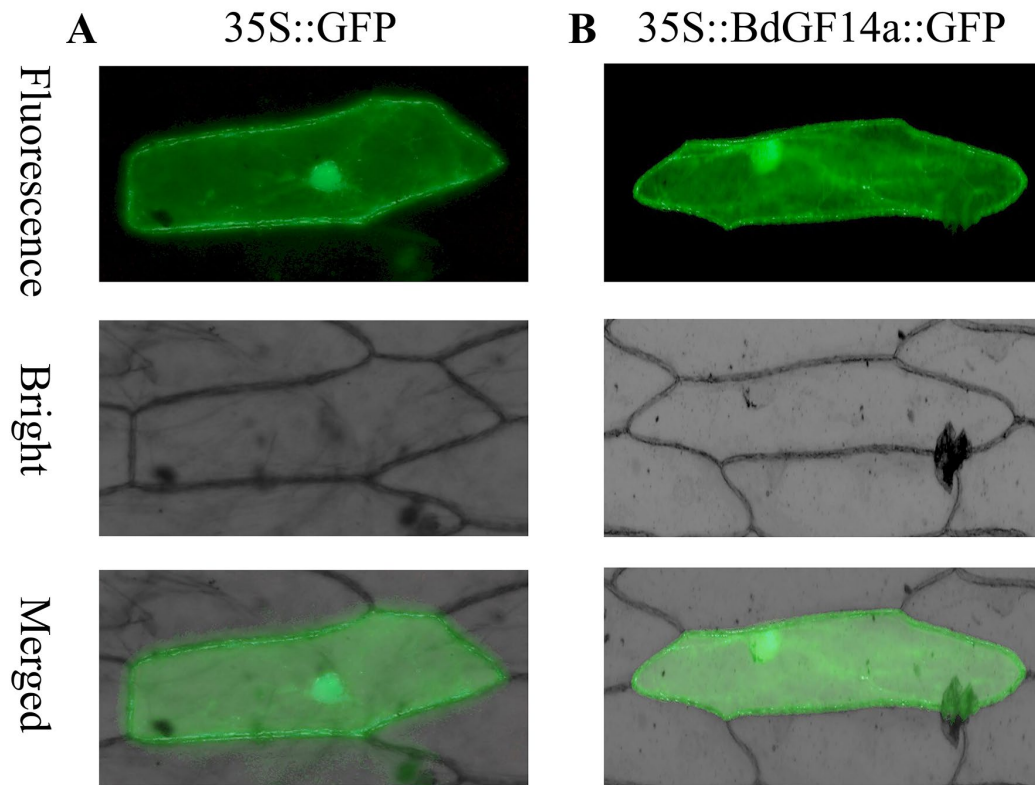

**Figure S3.** Subcellular localization of GFP and BdGF14a::GFP fusion protein in onion epidermal cells. The plasmids of *pBI121-BdGF14a-GFP* (B) and *PBI121-GFP* (control) (A) were introduced into onion epidermal cells by particle bombardment. The green fluorescence signals were observed by fluorescence microscopy (IX71, OLYMPUS, Japan).

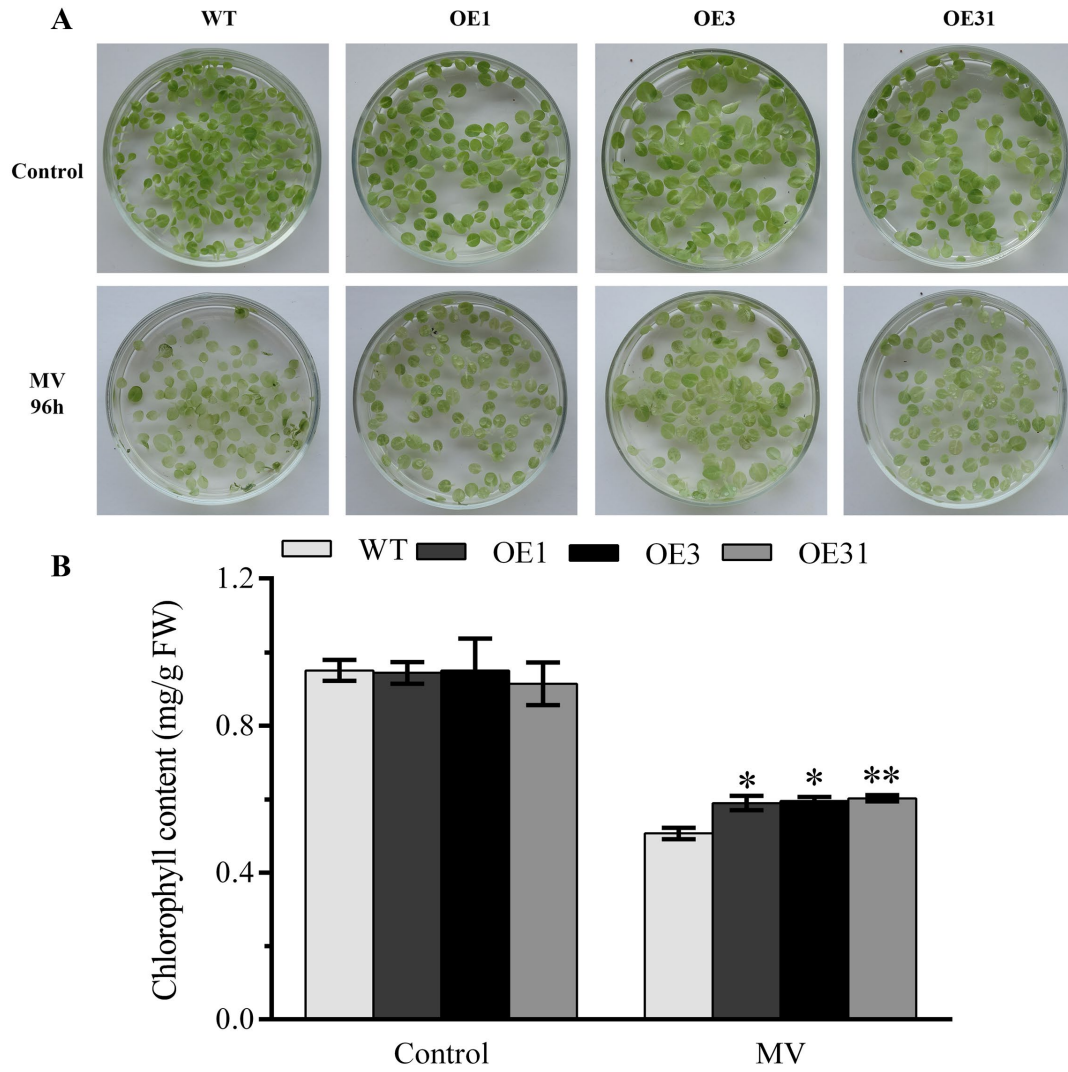

**Figure S4.** Oxidative tolerance analysis of *BdGF14a*-overexpressing and WT tobaccos under MV treatment. The leaves of 3-week-old *BdGF14a*-overexpressing and WT tobaccos were stained at distilled water with or without MV. The leaves were treated by MV for 96 h. (A) The photographs after treatment. (B) The chlorophyll content. Error bars are calculated from three replicates. Asterisks indicate statistically significant variations (\* $P < 0.05$ ; \*\* $P < 0.01$ ).

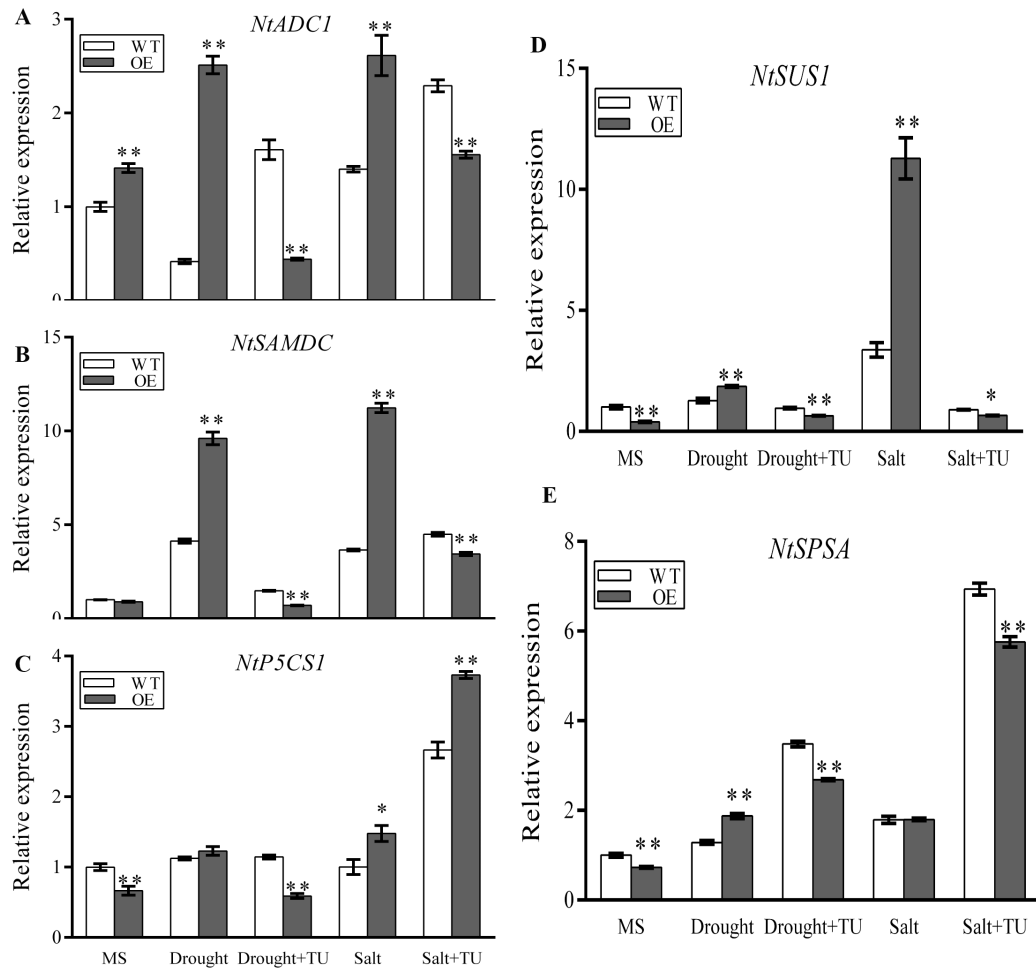

**Figure S5.** Expression patterns of osmolytes (polyamine, soluble sugar, and proline) biosynthesis-related genes in BdGF14a-transgenic tobaccos under stress-inducing conditions. Leaves of OE and WT Seedlings grew under normal, and stress treatments (drought and salt) with or without the sodium tungstate (Tu), were obtained and total RNAs were extracted. These genes including *NtADC1* (A), *NtSAMDC* (B), *NtP5CS1* (C), *NtSUS1* (D) and *NtSPSA* (E) were analyzed by qRT-PCR. Error bars are calculated from three replicates. Asterisks indicate statistically significant variations (\* $P < 0.05$ ; \*\* $P < 0.01$ ).



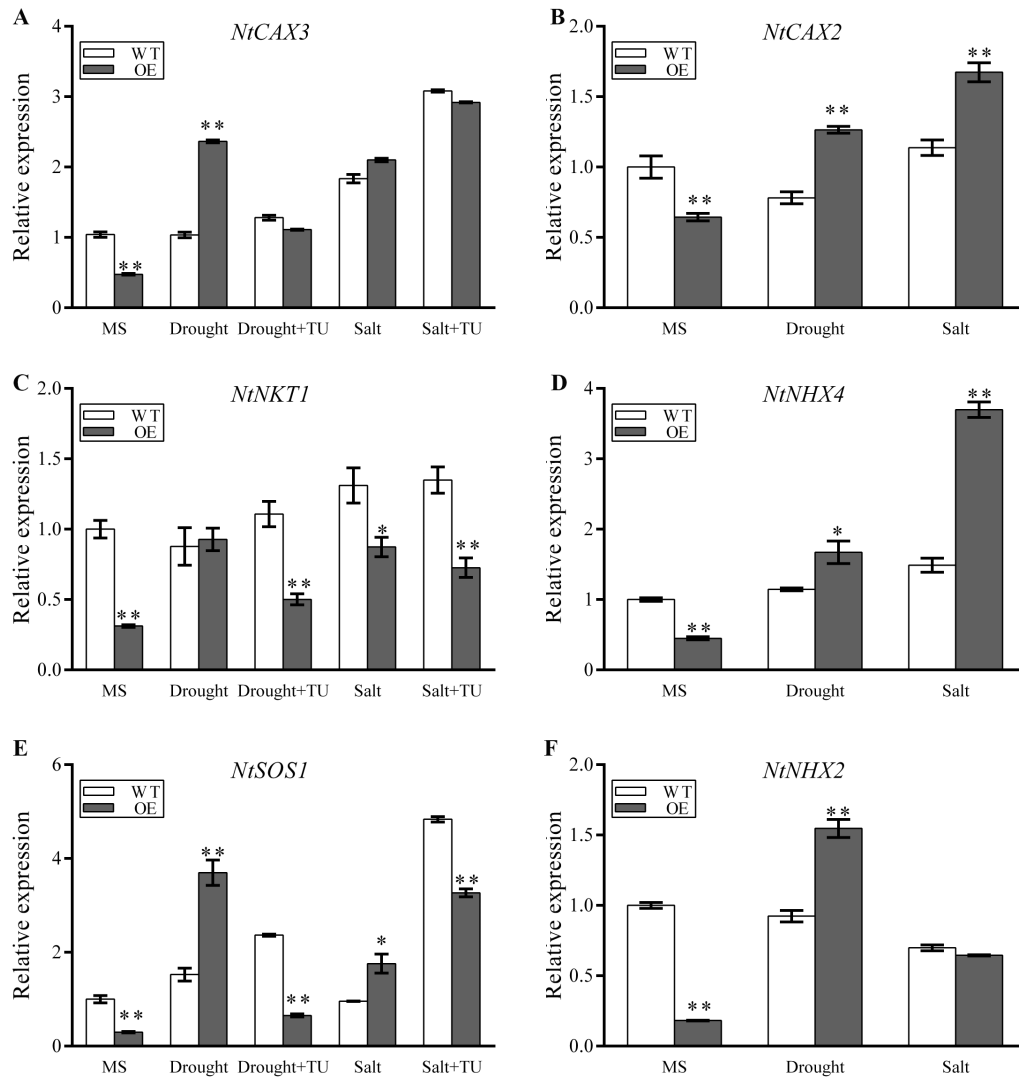

**Figure S6.** Expression patterns of ion channel-related genes in BdGF14a-transgenic tobaccos under under abiotic stresses. Leaves of WT and OE seedlings grew under normal, stress treatments (drought and salt) with or without Tu, were obtained and total RNAs were extracted. The ion channel related genes including *NtCAX3* (A), *NtCAX2* (B), *NtNKT1* (C), *NtNHX4* (D), *NtSOS1* (E) and *NtNHX2* (F) were analyzed by qRT-PCR. Error bars are calculated from three replicates. Asterisks indicate statistically apparent variations (\* $P < 0.05$ ; \*\* $P < 0.01$ ).

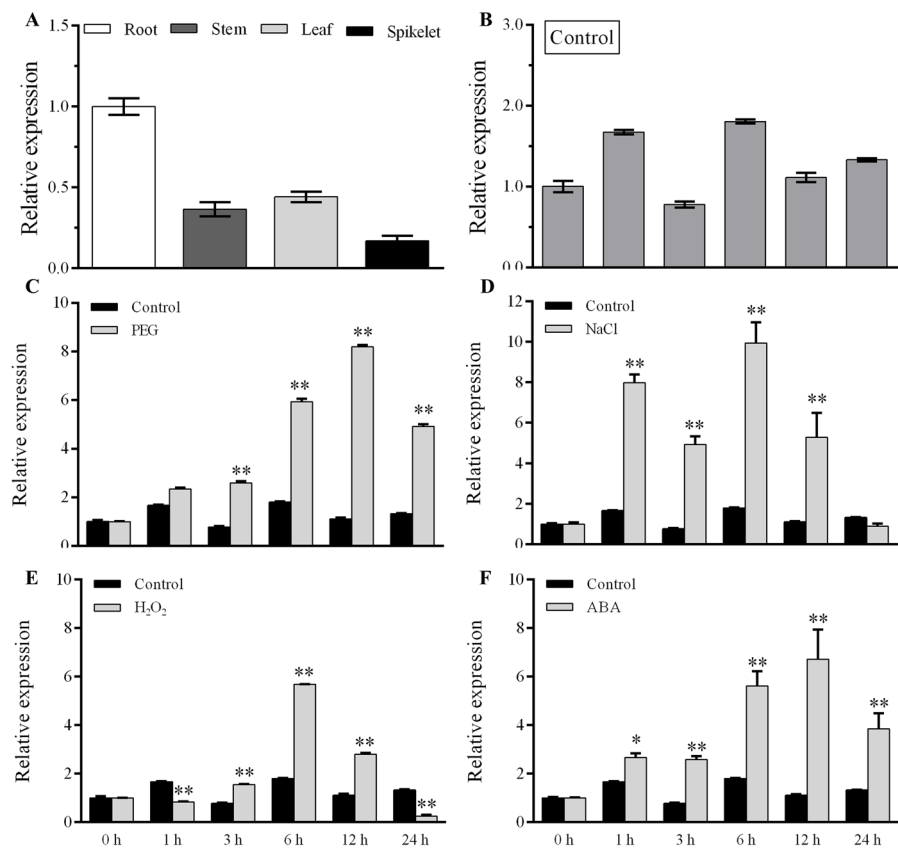

**Figure S7.** Expression patterns of BdbZIP62 in different organs and stress treatments by qRT-PCR analysis in *B. distachyon*

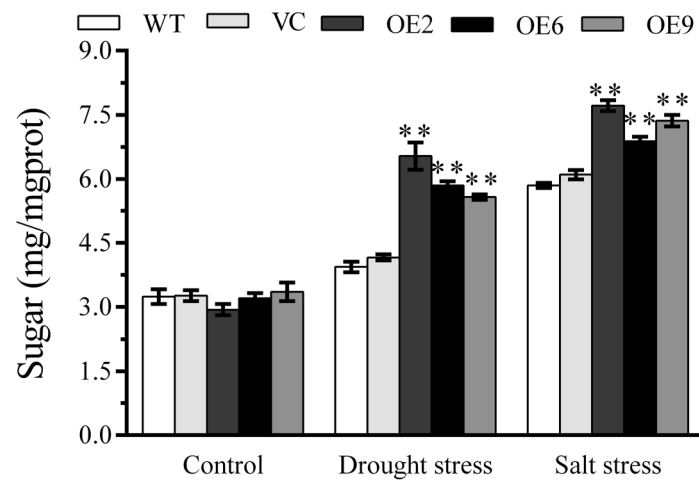

**Figure S8.** The sugar contents in BdbZIP62-transgenic tobaccos under salinity and drought. Error bars are calculated from three replicates. Asterisks indicate statistically apparent differences (\* $P < 0.05$ ; \*\* $P < 0.01$ ).

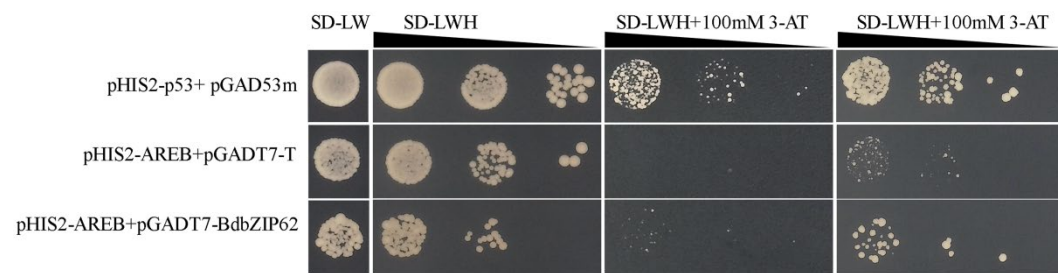

**Figure S9.** Y1H assay of BdbZIP62 interacted with ABRE *cis*-element. Y1H assay of BdbZIP62 interacted with ABRE *cis*-element. The recombinant vectors pHIS2-ABRE and pGADT7-BdbZIP62 were cotransformed into the Y187, and was plated on the SD-LW medium at 30°C for 2–3 d and then spotted onto SD-LW, SD-LWH, SD-LWH+100 mM 3-AT for another 3 d and 5 d. The cotransformed pHIS2-ABRE with pGADT7 empty vector, and pGAD53m with pHIS2-P53 were used as the negative and positive controls.
